# Supplementary material for: Array-based capture, distribution, counting and multiplexed assaying of beads on a centrifugal microfluidic platform
Source: Royal Society of Chemistry journal article supplement (doi:10.1039/c2lc21170j), 2012-01-01
Supplement: c2lc21170j.pdf [file c2lc21170j.pdf]

Electronic Supplementary Information for

## **Array-Based Capture, Distribution, Counting and Multiplexed Assaying of Beads on a Centrifugal Microfluidic Platform**

*Robert Burger, Patrick Reith, Gregor Kijanka, Victor Akujobi, Patrick Abgrall, and Jens Ducreé*

*Biomedical Diagnostics Institute, National Centre for Sensor Research, School of Physical Sciences, Dublin*

*City University, Glasnevin, Dublin 9, Ireland*

*E-mail: [robert.burger2@mail.dcu.ie](mailto:robert.burger2@mail.dcu.ie)*

## Fabrication Process

### Master Fabrication

Moulds for PDMS (Polydimethylsiloxane, Sylgard 184, Dow Corning GmbH, Germany) casting were manufactured by lithographic structuring of SU8 3025 photoresist (Microchem, USA) and WBR2100 dry film photoresist (DFR) (DuPont, USA). To this end, first a layer of SU8 3025 was spin-coated on a clean silicon wafer, soft-baked on a levelled hot plate and exposed to UV light. After UV exposure, post exposure bake was performed and unexposed resist was removed using standard developer solution. The wafer was then rinsed with clean developer, followed by Isopropanol (IPA) and dried with pressurized nitrogen. The wafer was then baked on a hot plate for 1 minute. Subsequently, 2 layers of DFR were laminated on top of the SU8 3025. The DFR was then exposed to UV light to create the second layer of the mould. Then the DFR was placed on a hot plate, followed by removal of unexposed resist in a bath of 1.6 %  $K_2CO_3$  in DI water. Table 1 summarizes the process parameters.

**Table 1: Process parameters for mould fabrication**

| Layer                       | #  | Step                                         | Parameters                        |
|-----------------------------|----|----------------------------------------------|-----------------------------------|
| <b>1</b><br><b>SU8 3025</b> | 1  | Clean Wafer                                  | DI water and IPA, dry with $N_2$  |
|                             | 2  | Spin Coating                                 | 2500 RPM => 30 $\mu m$ thickness  |
|                             | 3  | Soft Bake                                    | 14 min @ 95°C on Hot Plate        |
|                             | 4  | Exposure Level 1                             | Exposure energy: 280 $mJ cm^{-2}$ |
|                             | 5  | Post Exposure Bake                           | 3 min @ 95°C                      |
|                             | 6  | Develop                                      | 10 min. in standard SU8 Developer |
|                             | 7  | Rinse                                        | Rinse with fresh SU8 Developer    |
|                             | 8  | Rinse                                        | IPA, dry with $N_2$               |
|                             | 9  | Hard Bake                                    | 1 min @ 150°C on Hot Plate        |
| <b>2</b><br><b>WBR2100</b>  | 10 | Laminate WBR2100 (2x)                        | Roll Temperature: 95°C            |
|                             | 11 | Alignment 2 <sup>nd</sup> Layer and Exposure | Exposure energy: 440 $mJ cm^{-2}$ |
|                             | 12 | Post Exposure Bake                           | 55 s @ 100°C                      |
|                             | 13 | Develop                                      | 20 min in 1.6 % $K_2CO_3$         |
|                             | 14 | Rinse                                        | DI water                          |

### Surface Coating

In order to facilitate release of the PDMS slab from the mould, the surface was treated with a hydrophobic coating. To this end the mould was immersed in a bath of 10-mM Octadecyltrichlorosilane (Sigma Aldrich, IRELAND) in anhydrous Hexane (Sigma Aldrich, IRELAND) for 2 hours. The mould was subsequently rinsed with Methanol and baked for 1 hour at 100 °C on a hot plate. This resulted in coating with a water contact angle > 100 °.

## PDMS Replication

The microstructures on the mould were replicated in PDMS to create functional chips. PDMS was mixed in a ratio of 1:5 (curing agent : base), poured onto the mould and degassed under vacuum for 30 minutes to remove entrapped air. Next, the PDMS was cured in an oven at 85 °C for 15 minutes. The PDMS was then cut to disc shape and access holes were punched. PDMS with a mixing ratio of 1:20 (curing agent : base) was then spin-coated at 1000 rpm on a PMMA (Poly(methyl methacrylate, Radionics, IRELAND) disc and cured in the oven at 85 °C for 30 minutes. Afterwards the PDMS coated PMMA disc was treated with O<sub>2</sub> plasma for 5 minutes. After the plasma treatment both PDMS pieces were aligned, bonded and placed in the oven at 85 °C for at least 3 hours.

The whole manufacturing process is summarized in Fig. 1.

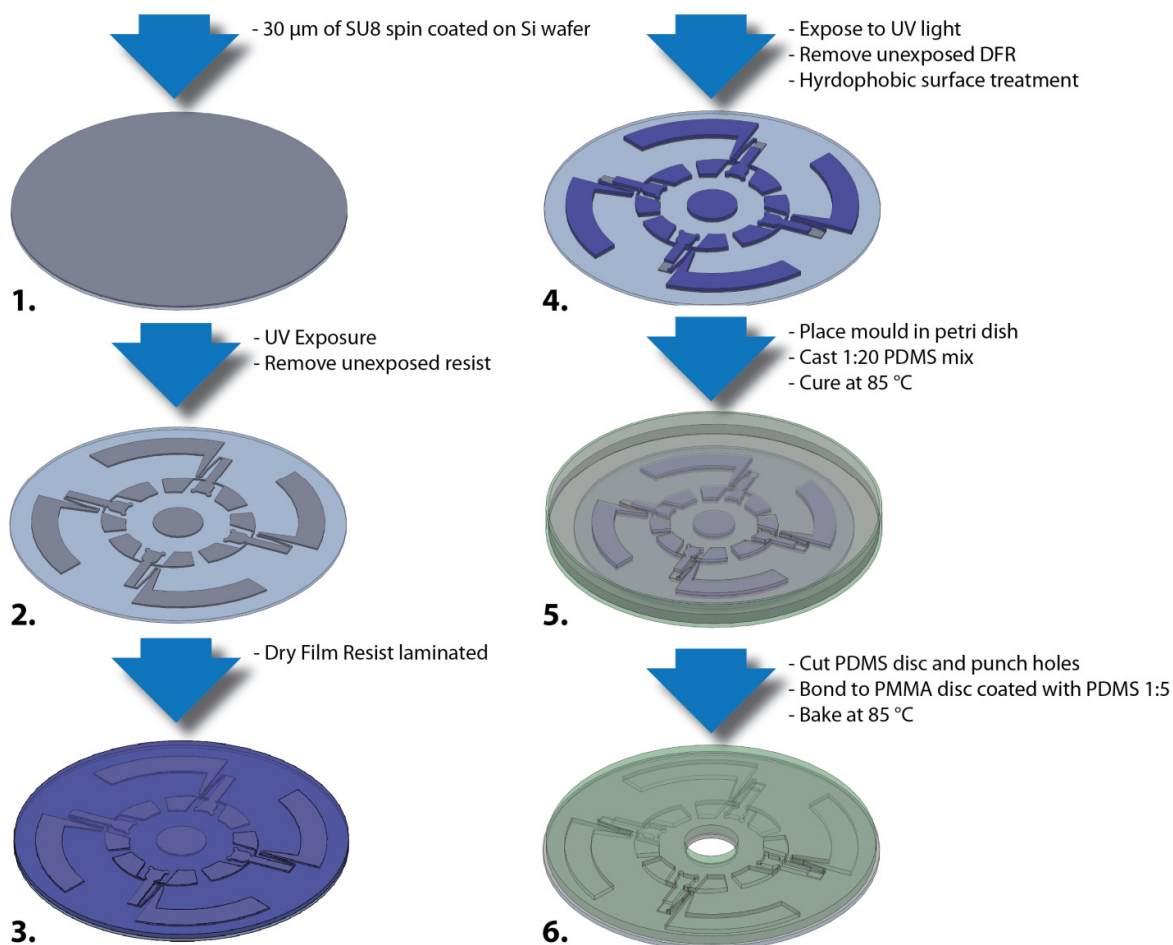

Figure 1: Summary of fabrication process. Fabrication of mould using SU8 and dry film resist (1 – 4). PDMS is cast on the mould (5.) and the disc subsequently assembled (6.).
